# Supplementary material for: Differential Impact of COVID-19 on the Use of Tele–mental Health Among Veterans Living in Urban or Rural Areas
Source: Atypon-hosted journal article supplement (doi:10.1176/appi.ps.202100363), 2022-06-02
Supplement: appi.ps.202100363.ds001.pdf [file appi.ps.202100363.ds001.pdf]

Supplemental Table 1. Demographics Overall and Comparisons between Rural and Urban for those with a Mental Health Visit between July 2019 and October 2020

|                                  | Total         |           | Rural       |           | Urban         |           | P-value | Effect Size<br>d/phi |
|----------------------------------|---------------|-----------|-------------|-----------|---------------|-----------|---------|----------------------|
|                                  | N = 1,941,761 |           | N = 557,668 |           | N = 1,384,093 |           |         |                      |
|                                  | <i>Mean</i>   | <i>SD</i> | <i>Mean</i> | <i>SD</i> | <i>Mean</i>   | <i>SD</i> |         |                      |
| Age                              | 54.6          | 16.3      | 56.2        | 16.0      | 53.9          | 16.4      | <0.001  | 0.1                  |
|                                  | <i>N</i>      | <i>%</i>  | <i>N</i>    | <i>%</i>  | <i>N</i>      | <i>%</i>  |         |                      |
| Gender                           |               |           |             |           |               |           | <0.001  | 0.0                  |
| Males                            | 1,655,018     | 85.2      | 488,422     | 87.6      | 1,166,596     | 84.3      |         |                      |
| Females                          | 286,743       | 14.8      | 69,426      | 12.4      | 217,497       | 15.7      |         |                      |
| Race/Ethnicity (n = 1,874,166)   |               |           |             |           |               |           | <0.001  | 0.2                  |
| Black                            | 450,689       | 24.0      | 67,271      | 12.4      | 383,418       | 28.8      |         |                      |
| White – Non Hispanic             | 1,167,276     | 62.3      | 427,047     | 79.0      | 740,229       | 55.5      |         |                      |
| White –Hispanic/Latino           | 190,522       | 10.2      | 31,706      | 5.9       | 158,816       | 11.9      |         |                      |
| Asian American                   | 24,253        | 1.3       | 2,537       | 0.5       | 21,716        | 1.6       |         |                      |
| Indian/Alaskan Native            | 19,978        | 1.1       | 7,769       | 1.4       | 12,209        | 0.9       |         |                      |
| Native Hawaiian/Pacific Islander | 21,448        | 1.1       | 4,432       | 0.8       | 17,016        | 1.3       |         |                      |

Supplemental Table 2. Results of Segmented Regression Models for Interrupted Time Series for Urban and Rural Veterans Separately

| Effect                                     | Urban Veterans |            |         | Rural Veterans |            |         |
|--------------------------------------------|----------------|------------|---------|----------------|------------|---------|
|                                            | b (SE)         | 95% CIs    | p-value | b (SE)         | 95% CIs    | p-value |
| Time (July '19 to Oct '20)                 | 0.4 (0.2)      | 0.1, 0.7   | 0.03    | 0.4 (0.1)      | 0.1, 0.7   | 0.009   |
| Phase<br>(pre-COVID versus COVID)          | 13.5 (1.3)     | 10.8, 16.2 | <0.001  | 12.9 (1.1)     | 10.5, 15.3 | <0.001  |
| Time since COVID<br>(April '20 to Oct '20) | 1.8 (0.3)      | 1.3, 2.4   | <0.001  | 1.2 (0.2)      | 0.6, 1.7   | 0.005   |

Note: Rural-urban differences in each effect were determined by examining whether the b for the urban estimate fell outside the 95% confidence interval for the rural estimate and vice versa.
